# Supplementary material for: Towards real time analysis of protein secretion from single cells
Source: Royal Society of Chemistry journal article supplement (doi:10.1039/b908679j), 2009-01-01
Supplement: b908679j.pdf [file b908679j.pdf]

Electronic supplementary information to the communication:

## Towards real time analysis of protein secretion from single cells

Hendrik Kortmann,<sup>a</sup> Felix Kurth,<sup>a</sup> Lars M. Blank,<sup>\*ab</sup> Petra S. Dittrich,<sup>ac</sup> and Andreas Schmid<sup>\*ab</sup>

DOI: 10.1039/b000000x

### 5 Materials and methods

#### Strains and media

The *S. pombe* auxotrophic strain NCYC 2036 (*h<sup>-</sup>ura4-D18*)  
was transformed with plasmid pJMN6 to yield the new strain  
JMN6.<sup>1</sup> This new strain is in the following denoted as eGFP  
10 (enhanced green fluorescent protein) strain/cell, while the  
parental strain NCYC2036 is referred to as wild type  
strain/cell. Briefly plasmid pJMN6 was constructed by  
inserting a *cpy1* secretion signal<sup>2</sup> and a scFv-cDNA<sup>3</sup> into  
plasmid pREP42GFP-C.<sup>4</sup> In this construct transcription is  
15 regulated by the thiamin repressible *nmt41* promoter.<sup>4</sup>

Yeast cells were cultivated in 0.8 mL potassium phthalate  
(30 mM) buffered Verduyn medium<sup>5</sup> with 2% glucose and 0.1  
g L<sup>-1</sup> uracil in Eppendorf LidBac tubes using an Eppendorf  
Thermomixer Comfort (Eppendorf AG, Germany) at 800 rpm  
20 and 33 °C. The medium for the eGFP strain was uracil free to  
prevent segregative plasmid loss. For cultivation in the  
Envirostat, non-buffered Verduyn medium with a conductivity  
of 0.995 S m<sup>-1</sup> was used.<sup>6</sup>

#### The microfluidic chip

25 The Envirostat, a single cell analysis platform allowing  
cultivation in a fully controlled environment, was used.<sup>6</sup> The  
core part of the Envirostat is a glass chip (Cytocon<sup>400</sup>, Perkin  
Elmer, USA) and a power supply, which were developed by  
Fuhr's group.<sup>7,8</sup> The bottom glass plane of the chip (thickness  
30 of 0.15 mm) is suited for fluorescence analysis. The chip  
bears seven dielectrophoretic elements for cell manipulation  
and trapping (Fig. suppl.1 and next paragraph), controlled by  
the software Switch and a generator (Perkin Elmer, USA).<sup>7</sup>  
The overall channel height is 28 μm, and the width varies  
35 from 150 to 800 μm. The chip was connected *via* a newly  
developed world-to-chip interface.<sup>9</sup> Constant medium flow  
conditions were achieved by syringe pumps (World Precision  
Instruments Inc., USA). All solutions for *in-chip* usage were  
sonicated and filtered (0.2 μm pore size). Tubings, valves, and  
40 chip were sterilized after each experiment with a 40% ethanol  
solution. For further handling descriptions see Kortmann *et al.*<sup>6</sup>

#### In chip single cell cultivation, induction, and analysis

Yeast cells in the Envirostat were manipulated and trapped by  
45 negative dielectrophoresis (nDEP), as reported previously.<sup>6</sup>  
For inoculation, yeasts were harvested with a 2 μL syringe  
from an exponentially growing culture. Two hundred to 500  
nanolitres of cell suspension (~2,000 cells mL<sup>-1</sup>) were injected  
into the inlet flow. The cells were transported by a flow  
50 velocity of 180 μm s<sup>-1</sup> (equal to 2 nL s<sup>-1</sup>) to the cell trapping

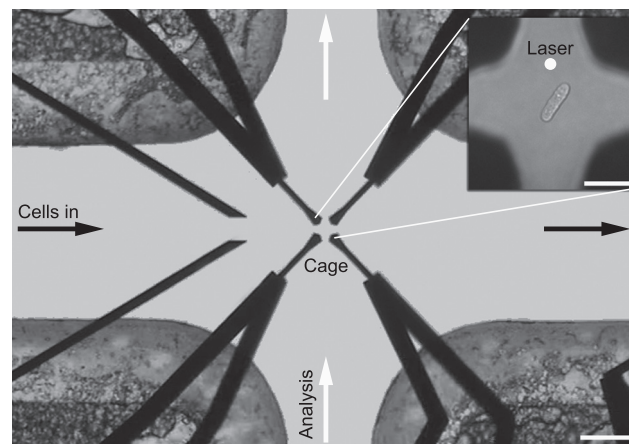

55 **Fig. suppl.1** Cell cultivation and analysis area in glass chip,<sup>7</sup> core  
part of the Envirostat. The black structures are electrode pairs; four  
pairs form the cage (cell trapping area) and two pairs on the left  
form a funnel structure. Cells entered the cage area through the  
main channel (indicated by the black arrows). For cell induction  
60 and during analysis the thiamine free medium entered from one  
side channel and left through the opposing side channel (indicated  
by the white arrows). Scale bar is 100 μm. The inset shows a  
trapped cell in the cage. The white dot illustrates the position of the  
70 laser during cell analysis. Scale bar is 10 μm.

75 area, the so called 'cage' (Fig. suppl.1). Cells were trapped in  
the cage by nDEP (ROT mode at 2.6 V<sub>rms</sub>, 7.5 MHz). The  
growth medium velocity during cultivation was 25 μm s<sup>-1</sup> and  
the cultivation temperature 35 °C. Cells in the activated nDEP  
field are positioned and centered equidistant from the eight  
80 electrodes, thus floating contactless in the medium flow. To  
induce GFP secretion the Verduyn medium flow in the main  
channel was stopped and inductive (thiamin free) Verduyn  
medium was supplied through a side channel (Fig. suppl.1).

#### Optical setup

85 The Envirostat was mounted on the stage of an inverted  
microscope (Olympus IX71). For detection of eGFP, the blue line  
(488 nm) of an Argon ion laser (Laserlight, Berlin,  
Germany) is guided into the microscope, reflected by a  
dichroic mirror (405 DLPC, AHF Tübingen, Germany), and  
90 focused by a water immersion objective (UPlanApo 60x, NA  
1.2, Olympus).<sup>10</sup> The laser focus diameter, determined by  
fluorescence correlation spectroscopy, was 0.72 μm. Exposure  
intensities of 103-105 W cm<sup>-2</sup> were varied by placing neutral  
density filters into the beam path. Fluorescence light from the  
95 sample was collected by the same objective, passed a band  
pass filter (transparent for λ=500-550 nm, AHF, Tübingen,  
Germany), and was transferred via optical fibers (diameter  
100 μm) to the detector (avalanche photodiodes CD3017,  
EG&G, Vaudreuil, Canada). The signal, *i.e.*, counted photons  
100 within a given integration time (here: 0.26 ms), was recorded

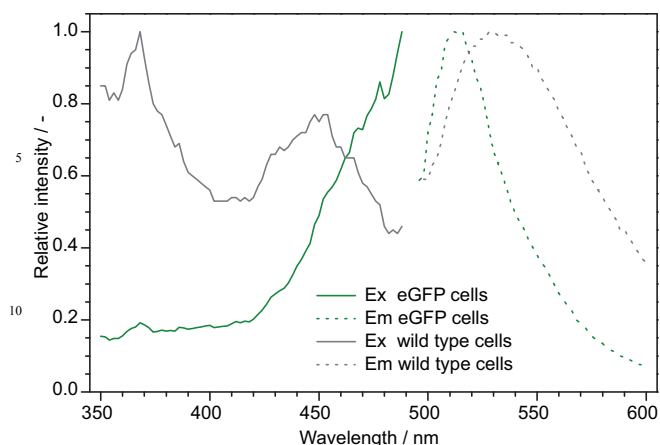

15 **Fig. suppl.2** Analysis of eGFP production by the eGFP *S. pombe* strain. Shown are the emission and excitation spectra of an eGFP cell culture and for comparison of a wild type cell culture.

by a correlator card (ALV, Langen, Germany). The integration of 0.26 ms ensures that we obtain photons of one eGFP within  
20 one or maximum two integration times, as the eGFP dwell time was less than 0.2 ms in pure diffusion. Under the flowing conditions used here ( $25 \mu\text{m s}^{-1}$ ) the dwell time is hardly shorter. During each experiment, data were collected every 15 min for 5 min. Additionally, the microscope is equipped with  
25 a mercury arc lamp and an EMCCD camera (iXon DV887, Andor Technologies, Belfast, Northern Ireland) for acquisition of fluorescence images.

#### Laser spot positioning

Diffusion of eGFP is a reason why close proximity  
30 measurement was chosen. Furthermore, CFD simulations revealed the position at which the highest concentrations of secreted molecules can be expected.<sup>6</sup> In the described experiments, the channel dimensions have a minor influence on the detection efficiency, i.e. the percentage of eGFP  
35 proteins detected of the total number of proteins that are secreted. On their way from the cells to the detection volume (ca.  $3 \mu\text{m}$ ), diffusion of GFP towards the channel walls is almost negligible, hence channel size does not influence the detection. Since detection was directly downstream of the cell,  
40 the size of the cell/cells compared to the size and position of the laser spot defines how many proteins can be detected. Particularly, careful position of the laser spot is required.

## Results

### Verification of eGFP production and secretion by the cells

45 Production of eGFP by the eGFP cells was verified by an emission-excitation scan of an eGFP culture. The spectra of the culture matched the eGFP characteristic (emission: 509 and excitation: 488) (Fig. suppl.2). The spectra were taken with a microplate reader (Infinite 200, TECAN, Switzerland), for  
50 the emission spectrum the culture was excited with 465 nm, for the excitation spectrum emission at 520 nm was recorded (step size was 2 nm).

To test secretion of eGFP, we analyzed the cell free  
55 supernatant of the eGFP culture by confocal microscopy. The fluorescence trace of the supernatant showed bursts from

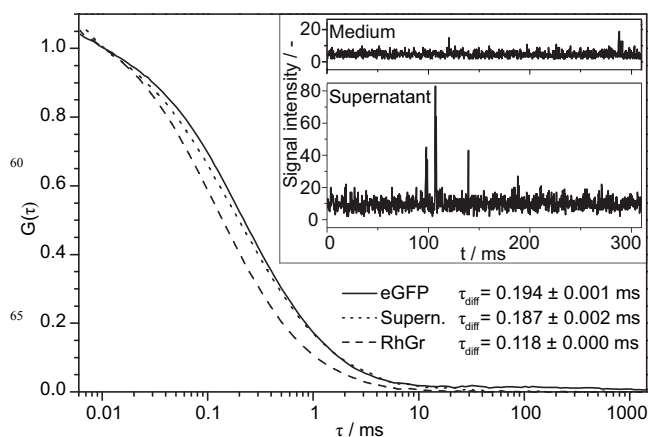

70 **Fig. suppl.3** Diffusion analysis by fluorescence correlation spectroscopy of purified eGFP and supernatant of an eGFP cell culture. The indicated diffusion time  $\tau_{\text{diff}}$  is derived from the autocorrelation function.<sup>11</sup> Rhodamine Green (RhGr) was used for comparison. Inset: Detector signal from blank medium (top) and  
75 supernatant of an eGFP cell culture (bottom).

secreted eGFP molecules. The mean signal intensity of the  
supernatant was twice as high as the mean intensity of the pure medium (Fig suppl.3 inset). Moreover, the presence of secreted eGFP was verified via diffusion analysis using  
80 fluorescence correlation spectroscopy (FCS) (Fig. suppl.3). The comparison of the autocorrelation function,  $G(\tau)$ , of the supernatant to those of pure eGFP (Biovision), and pure Rhodamine Green (RhGr) (Invitrogen) and the determination of the diffusion time,  $\tau_{\text{diff}}$ , strongly indicated the existence of  
85 correctly folded eGFP in the supernatant (Fig. suppl.3).

Consequently, the *S. pombe* produced and secreted active eGFP into the medium at concentrations that could be detected with standard laboratory equipment.

### Cell viability test in the Envirostat

90 Prior to the eGFP detection tests in the chip, the viability of *S. pombe* under given in chip cultivation conditions was verified by monitoring cell growth (Fig suppl.4).

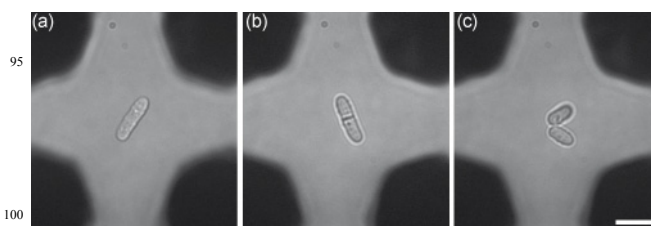

95 **Fig. suppl.4** The *S. pombe* growing in the nDEP cage, in (a) at cultivation start, in (b) after 50 min, and in (c) after 78 min. Cells were trapped and rotated by the nDEP field and were supplied by a constant Verduyn medium flow from the left. Black structures in the corners are the cage electrodes. Scale bar is  $10 \mu\text{m}$ .  
100

### Particle displacement by beads

The existence of particle displacement, a phenomenon previously described for obstacles in a microfluidic chip,<sup>12, 13</sup> hypothesized to be present in the cell experiments was  
110 sustained by experiments using micro-beads of  $11 \mu\text{m}$  in diameter. Micro-beads were used in order to exclude any cell bias. Indeed, particle displacement was clearly observed, as

the number of events downstream of single trapped micro-beads was reduced (Fig. suppl.5), correlating well with results from wild type cells (Fig. 2). The absolute number of medium events (Fig. suppl.5) differ from numbers in the cell

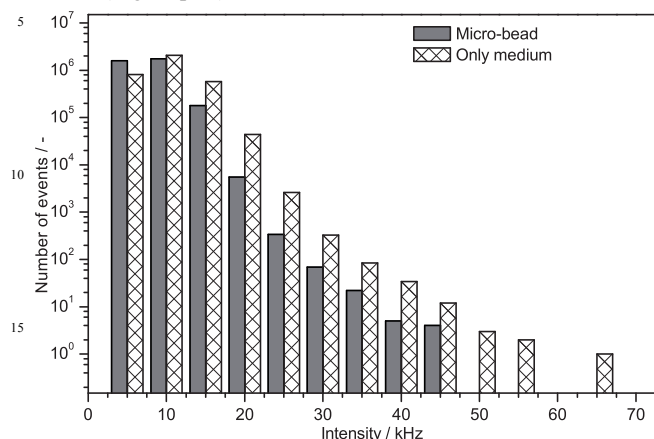

20 **Fig. suppl.5** Number of events in growth medium and in growth medium downstream of a micro-bead, with a diameter of 11  $\mu\text{m}$ , detected in the chip by confocal microscopy. Each bar represents the summed number of events for 5 consecutive intensities of the mean value of 3 measurements.

25 experiments (Fig. 3 B and Fig. 4), highlighting the necessity to compare data from the very same experiment. Furthermore, the particle displacement results indicate that lateral laser positioning is crucial and close proximity to the cell will maximize signal to noise ratio.

### 30 Notes and references

<sup>a</sup> ISAS Dortmund, Bunsen-Kirchhoff-Str. 11, D-44139 Dortmund, <sup>b</sup> TU Dortmund, Emil-Figge-Str.66, D-44221 Dortmund, Germany, <sup>c</sup> ETH Zurich, Wolfgang-Pauli-Str. 10, CH-8093 Zurich, Switzerland

- 35 1. J. M. Naumann and M. Bureik, unpublished work.
2. S. Kjaerulff and M. R. Jensen, *Biochem Biophys Res Commun*, 2005, **336**, 974-982.
3. K. Winkler, A. Kramer, G. Kuttner, M. Seifert, C. Scholz, H. Wessner, J. Schneider-Mergener and W. Hohne, *J Immunol*, 2000, **165**, 4505-4514.
- 40 4. R. A. Craven, D. J. Griffiths, K. S. Sheldrick, R. E. Randall, I. M. Hagan and A. M. Carr, *Gene*, 1998, **221**, 59-68.
5. C. Verduyn, E. Postma, W. A. Scheffers and J. P. Van Dijken, *Yeast*, 1992, **8**, 501-517.
- 45 6. H. Kortmann, P. Chasanis, L. M. Blank, J. Franzke, E. Y. Kenig and A. Schmid, *Lab Chip*, 2009, **9**, 576-585.
7. T. Müller, A. Pfennig, P. Klein, G. Gradl, M. Jager and T. Schnelle, *IEEE Eng Med Biol Mag*, 2003, **22**, 51-61.
8. T. Schnelle, T. Müller and G. Fuhr, *J Electrostat*, 2000, **50**, 17-29.
- 50 9. H. Kortmann, L. M. Blank and A. Schmid, *Lab Chip*, 2009, **9**, 1455-1460.
10. P. S. Dittrich and P. Schuille, *Anal Chem*, 2003, **75**, 5767-5774.
11. U. Haupts, S. Maiti, P. Schuille and W. W. Webb, *Proc Natl Acad Sci USA*, 1998, **95**, 13573-13578.
- 55 12. L. R. Huang, E. C. Cox, R. H. Austin and J. C. Sturm, *Science*, 2004, **304**, 987-990.
13. D. W. Inglis, J. A. Davis, R. H. Austin and J. C. Sturm, *Lab Chip*, 2006, **6**, 655-658.
